# Supplementary material for: Coral micro-fragmentation assays for optimizing active reef restoration efforts
Source: PeerJ journal article supplement (doi:10.7717/peerj.13653), 2022-07-18
Supplement: Appendix_2_Pyramid_outplanting_timetable.pdf [file Appendix_2_Pyramid_outplanting_timetable.pdf]

| <b>Phase</b> | <b>Activity</b>                                                                                | <b>In-situ nursery</b> | <b>Ex-situ nursery</b> |
|--------------|------------------------------------------------------------------------------------------------|------------------------|------------------------|
| 1            | Fragment and measure sets 1, 2 & 3 (n=54)<br>Deployment of set 1 (n=18)<br>(direct transplant) | 12/10/2018             | 02/06/2019             |
| 2            | Deployment of set 2 (n=18)<br>(4 month nursery growth)                                         | 04/04/2019             | 05/28/2019             |
| 3            | Deployment of set 3 (n=18)<br>(8 month nursery growth)                                         | 08/16/2019             | 10/18/2019             |
| 4            | Final measurements<br>of sets 1, 2 & 3 (n=54)                                                  | 12/12/2019             | 07/08/2020             |
