# Supplementary material for: Coral micro-fragmentation assays for optimizing active reef restoration efforts
Source: PeerJ journal article supplement (doi:10.7717/peerj.13653), 2022-07-18
Supplement: Appendix_9_Pyramid_assay_summary.pdf [file Appendix_9_Pyramid_assay_summary.pdf]

|                                  | No. of fragments |            |                | Tissue area (cm <sup>2</sup> ) |               |           |                 |                 |
|----------------------------------|------------------|------------|----------------|--------------------------------|---------------|-----------|-----------------|-----------------|
|                                  | Start            | End        | % Survivorship | Start                          | End           | 3D End    | % 2D Net Growth | % 3D Net Growth |
| <b><i>Montipora capitata</i></b> | <b>594</b>       | <b>276</b> | <b>46%</b>     | <b>1005.4</b>                  | <b>2058.4</b> | <b>NA</b> | <b>105%</b>     | <b>NA</b>       |
| In-situ nursery                  | 297              | 123        | 41%            | 321.2                          | 697.3         | 1504.0    | 117%            | 368%            |
| Small                            | 189              | 73         | 39%            | 74.2                           | 165.1         | 365.5     | 123%            | 393%            |
| Medium                           | 81               | 36         | 44%            | 152.7                          | 276.9         | 657.5     | 81%             | 331%            |
| Large                            | 27               | 14         | 52%            | 94.3                           | 255.4         | 481.0     | 171%            | 410%            |
| Ex-situ nursery                  | 297              | 153        | 52%            | 684.2                          | 1361.0        | NA        | 99%             | NA              |
| Small                            | 189              | 80         | 42%            | 133.8                          | 305.9         | NA        | 129%            | NA              |
| Medium                           | 81               | 54         | 67%            | 316.2                          | 666.6         | NA        | 111%            | NA              |
| Large                            | 27               | 19         | 70%            | 234.3                          | 388.6         | NA        | 66%             | NA              |
| <b><i>Porites compressa</i></b>  | <b>594</b>       | <b>219</b> | <b>37%</b>     | <b>874.0</b>                   | <b>1750.6</b> | <b>NA</b> | <b>100%</b>     | <b>NA</b>       |
| In-situ nursery                  | 297              | 119        | 40%            | 373.0                          | 496.6         | 1068.2    | 33%             | 186%            |
| Small                            | 189              | 58         | 31%            | 75.3                           | 93.7          | 145.9     | 24%             | 94%             |
| Medium                           | 81               | 47         | 58%            | 182.6                          | 264.9         | 623.2     | 45%             | 241%            |
| Large                            | 27               | 14         | 52%            | 115.1                          | 137.9         | 299.1     | 20%             | 160%            |
| Ex-situ nursery                  | 297              | 100        | 34%            | 501.0                          | 1254.0        | NA        | 150%            | NA              |
| Small                            | 189              | 46         | 24%            | 113.3                          | 200.4         | NA        | 77%             | NA              |
| Medium                           | 81               | 38         | 47%            | 209.0                          | 643.0         | NA        | 208%            | NA              |
| Large                            | 27               | 16         | 59%            | 178.8                          | 410.7         | NA        | 130%            | NA              |
| <b>Grand Total</b>               | <b>1188</b>      | <b>495</b> | <b>42%</b>     | <b>1879.4</b>                  | <b>3809.0</b> | <b>NA</b> | <b>103%</b>     | <b>NA</b>       |
