# Supplementary material for: Coral micro-fragmentation assays for optimizing active reef restoration efforts
Source: PeerJ journal article supplement (doi:10.7717/peerj.13653), 2022-07-18
Supplement: Appendix_10_Pyramid_assay_model_ex-situ_surv.pdf [file Appendix_10_Pyramid_assay_model_ex-situ_surv.pdf]

| A) Ex-situ survivorship          |           | <i>Montipora capitata</i> |             |               |
|----------------------------------|-----------|---------------------------|-------------|---------------|
| Fixed effects                    | Estimate  | SE                        | z value     | Pr (> z )     |
| Intercept                        | 1.8640    | 1.0283                    | 1.813       | 0.0699        |
| Day outplanted                   | 2.0903    | 1.0357                    | 2.018       | <b>0.0436</b> |
| Medium fragments                 | -0.5002   | 0.9204                    | -0.543      | 0.5869        |
| Small fragments                  | -2.7124   | 0.9030                    | -3.004      | <b>0.0027</b> |
| Day outplanted: Medium fragments | -0.0782   | 0.9189                    | -0.085      | 0.9322        |
| Day outplanted: Small fragments  | 0.4557    | 0.8902                    | 0.512       | 0.6087        |
| Random effects                   | Variance  |                           | SD          |               |
| Pyramid: Genotype                | 6.6005    |                           | 2.5691      |               |
| Genotype                         | 0.2739    |                           | 0.5234      |               |
| R- squared                       | Marginal  |                           | Conditional |               |
|                                  | 0.4066    |                           | 0.8079      |               |
| AIC                              | 242.6     |                           |             |               |
| B)                               |           | <i>Porites compressa</i>  |             |               |
| Fixed effects                    | Estimate  | SE                        | z value     | Pr (> z )     |
| Intercept                        | 0.5929    | 0.7590                    | 0.781       | 0.435         |
| Day outplanted                   | 1.1289    | 0.7540                    | 1.497       | 0.134         |
| Medium fragments                 | -0.9578   | 0.6788                    | -1.411      | 0.158         |
| Small fragments                  | -2.8259   | 0.6883                    | -4.106      | 4.03e-05      |
| Day outplanted: Medium fragments | -0.2717   | 0.6559                    | -0.414      | 0.679         |
| Day outplanted: Small fragments  | -0.9466   | 0.6498                    | -1.457      | 0.145         |
| Random effects                   | Variance  |                           | SD          |               |
| Pyramid: Genotype                | 5.613e+00 |                           | 2.3691      |               |
| Genotype                         | 3.162e-08 |                           | 0.0001      |               |
| R- squared                       | Marginal  |                           | Conditional |               |
|                                  | 0.1385    |                           | 0.6816      |               |
| AIC                              | 286.1     |                           |             |               |
