# Supplementary material for: Coral micro-fragmentation assays for optimizing active reef restoration efforts
Source: PeerJ journal article supplement (doi:10.7717/peerj.13653), 2022-07-18
Supplement: Appendix_11_Pyramid_assay_model_in-situ_surv.pdf [file Appendix_11_Pyramid_assay_model_in-situ_surv.pdf]

| A) In-situ survivorship          |          | <i>Montipora capitata</i> |             |           |  |
|----------------------------------|----------|---------------------------|-------------|-----------|--|
| Fixed effects                    | Estimate | SE                        | z value     | Pr (> z ) |  |
| Intercept                        | -0.8625  | 2.4316                    | -0.355      | 0.7230    |  |
| Day outplanted                   | 0.6489   | 0.7447                    | 0.871       | 0.3840    |  |
| Medium fragments                 | -0.5031  | 0.7655                    | -0.657      | 0.5110    |  |
| Small fragments                  | -0.9665  | 0.7169                    | -1.348      | 0.1780    |  |
| Day outplanted: Medium fragments | -0.1175  | 0.8146                    | -0.144      | 0.8850    |  |
| Day outplanted: Small fragments  | 0.0003   | 0.7603                    | 0.000       | 1.000     |  |
| Random effects                   | Variance |                           | SD          |           |  |
| Pyramid: Genotype                | 0.4733   |                           | 0.688       |           |  |
| Genotype                         | 12.8264  |                           | 3.581       |           |  |
| R- squared                       | Marginal |                           | Conditional |           |  |
|                                  | 0.0282   |                           | 0.8072      |           |  |
| AIC                              | 235.1    |                           |             |           |  |
| B)                               |          | <i>Porites compressa</i>  |             |           |  |
| Fixed effects                    | Estimate | SE                        | z value     | Pr (> z ) |  |
| Intercept                        | 0.4548   | 0.7670                    | 0.593       | 0.5532    |  |
| Day outplanted                   | -0.1098  | 0.5674                    | -0.1930     | 0.8466    |  |
| Medium fragments                 | 0.8710   | 0.6082                    | 1.432       | 0.1521    |  |
| Small fragments                  | -0.8482  | 0.5369                    | -1.580      | 0.1141    |  |
| Day outplanted: Medium fragments | 1.1953   | 0.6491                    | 1.841       | 0.0656    |  |
| Day outplanted: Small fragments  | 0.2638   | 0.5459                    | 0.483       | 0.6289    |  |
| Random effects                   | Variance |                           | SD          |           |  |
| Pyramid: Genotype                | 1.4892   |                           | 1.2203      |           |  |
| Genotype                         | 0.8591   |                           | 0.9269      |           |  |
| R- squared                       | Marginal |                           | Conditional |           |  |
|                                  | 0.1505   |                           | 0.5043      |           |  |
| AIC                              | 272.8    |                           |             |           |  |
