# Supplementary material for: Coral micro-fragmentation assays for optimizing active reef restoration efforts
Source: PeerJ journal article supplement (doi:10.7717/peerj.13653), 2022-07-18
Supplement: Appendix_12_Pyramid_assay_model_ex-situ_growth.pdf [file Appendix_12_Pyramid_assay_model_ex-situ_growth.pdf]

| <b>A) Ex-situ net growth</b>     |                 |           |                      |
|----------------------------------|-----------------|-----------|----------------------|
| <i>Montipora capitata</i>        |                 |           |                      |
| <b>Fixed effects</b>             | <b>Estimate</b> | <b>SE</b> | <b>t value</b>       |
| Intercept                        | -38.0312        | 57.4953   | -0.661               |
| Day outplanted                   | 0.5114          | 0.2574    | 1.987                |
| Medium fragments                 | -15.9257        | 53.1771   | -0.299               |
| Small fragments                  | -60.2118        | 53.1771   | -1.132               |
| Day outplanted: Medium fragments | 0.4145          | 0.3323    | 1.248                |
| Day outplanted: Small fragments  | 0.8947          | 0.3323    | 2.693                |
| <b>Random effects</b>            | <b>Variance</b> | <b>SD</b> |                      |
| Pyramid: Genotype                | 3219            | 56.73     |                      |
| Genotype                         | 4828            | 69.48     |                      |
| Residual                         | 16112           | 126.93    |                      |
| <b>ANOVA</b>                     | <b>Chisq</b>    | <b>Df</b> | <b>Pr(&gt;Chisq)</b> |
| Intercept                        | 0.4375          | 1         | 0.5083               |
| Day outplanted                   | 3.9494          | 1         | <b>0.0468</b>        |
| Group size                       | 1.3769          | 2         | 0.5023               |
| Day outplanted: Group size       | 7.2633          | 2         | <b>0.0264</b>        |

  

| <b>B)</b>                        |                 |           |                      |
|----------------------------------|-----------------|-----------|----------------------|
| <i>Porites compressa</i>         |                 |           |                      |
| <b>Fixed effects</b>             | <b>Estimate</b> | <b>SE</b> | <b>t value</b>       |
| Intercept                        | 17.0623         | 59.6881   | 0.286                |
| Day outplanted                   | 0.1726          | 0.3680    | 0.469                |
| Medium fragments                 | 45.5539         | 62.9399   | 0.724                |
| Small fragments                  | -34.8691        | 62.9399   | -0.554               |
| Day outplanted: Medium fragments | -0.0240         | 0.3933    | -0.061               |
| Day outplanted: Small fragments  | -0.0240         | 0.3933    | -0.061               |
| <b>Random effects</b>            | <b>Variance</b> | <b>SD</b> |                      |
| Pyramid: Genotype                | 16956           | 130.21    |                      |
| Genotype                         | 282             | 16.79     |                      |
| Residual                         | 22571           | 150.24    |                      |
| <b>ANOVA</b>                     | <b>Chisq</b>    | <b>Df</b> | <b>Pr(&gt;Chisq)</b> |
| Intercept                        | 0.0817          | 1         | 0.7750               |
| Day outplanted                   | 0.2199          | 1         | 0.6391               |
| Group size                       | 1.6423          | 2         | 0.4399               |
| Day outplanted: Group size       | 0.0050          | 2         | 0.9975               |
