# Supplementary material for: Coral micro-fragmentation assays for optimizing active reef restoration efforts
Source: PeerJ journal article supplement (doi:10.7717/peerj.13653), 2022-07-18
Supplement: Appendix_13_Pyramid_assay_model_in-situ_growth.pdf [file Appendix_13_Pyramid_assay_model_in-situ_growth.pdf]

| A) In-situ net growth            |          |         |            |
|----------------------------------|----------|---------|------------|
| <i>Montipora capitata</i>        |          |         |            |
| Fixed effects                    | Estimate | SE      | t value    |
| Intercept                        | 12.3784  | 87.3530 | 0.142      |
| Day outplanted                   | 0.2647   | 0.2750  | 0.963      |
| Medium fragments                 | 13.7208  | 39.7216 | 0.345      |
| Small fragments                  | 8.62209  | 39.7216 | 0.217      |
| Day outplanted: Medium fragments | -0.0217  | 0.24964 | -0.087     |
| Day outplanted: Small fragments  | -0.0663  | 0.2496  | -0.266     |
| Random effects                   | Variance | SD      |            |
| Pyramid: Genotype                | 12527    | 111.93  |            |
| Genotype                         | 17148    | 130.95  |            |
| Residual                         | 8779     | 93.69   |            |
| ANOVA                            | Chisq    | Df      | Pr(>Chisq) |
| Intercept                        | 0.0201   | 1       | 0.8873     |
| Day outplanted                   | 0.9267   | 1       | 0.3357     |
| Group size                       | 0.1219   | 2       | 0.9409     |
| Day outplanted: Group size       | 0.0734   | 2       | 0.9640     |
| B)                               |          |         |            |
| <i>Porites compressa</i>         |          |         |            |
| Fixed effects                    | Estimate | SE      | t value    |
| Intercept                        | -40.1829 | 28.9583 | -1.388     |
| Day outplanted                   | 0.0194   | 0.1514  | 0.128      |
| Medium fragments                 | 31.1229  | 26.4796 | 1.175      |
| Small fragments                  | 20.5874  | 26.4796 | 0.777      |
| Day outplanted: Medium fragments | 0.1991   | 0.1664  | 1.196      |
| Day outplanted: Small fragments  | -0.1190  | 0.1664  | -0.715     |
| Random effects                   | Variance | SD      |            |
| Pyramid: Genotype                | 2554.4   | 50.54   |            |
| Genotype                         | 775.3    | 27.84   |            |
| Residual                         | 3901.2   | 62.46   |            |
| ANOVA                            | Chisq    | Df      | Pr(>Chisq) |
| Intercept                        | 1.9255   | 1       | 0.1653     |
| Day outplanted                   | 0.0164   | 1       | 0.8980     |
| Group size                       | 1.4295   | 2       | 0.4893     |
| Day outplanted: Group size       | 3.7292   | 2       | 0.1550     |
