# Supplementary material for: Coral micro-fragmentation assays for optimizing active reef restoration efforts
Source: PeerJ journal article supplement (doi:10.7717/peerj.13653), 2022-07-18
Supplement: Appendix_15_Block_assay_summary.pdf [file Appendix_15_Block_assay_summary.pdf]

| Site                       | No. of fragments |            |                | Tissue area (cm <sup>2</sup> ) |               |              |
|----------------------------|------------------|------------|----------------|--------------------------------|---------------|--------------|
|                            | Start            | End        | % Survivorship | Start                          | End           | % Net Growth |
| <b><i>M. capitata</i></b>  | <b>360</b>       | <b>197</b> | <b>55%</b>     | <b>832.5</b>                   | <b>1700.7</b> | <b>104%</b>  |
| 1                          | 36               | 22         | 61%            | 88.4                           | 209.2         | 137%         |
| 2                          | 36               | 26         | 72%            | 114.1                          | 290.5         | 155%         |
| 3                          | 36               | 18         | 50%            | 84.6                           | 144.8         | 71%          |
| 4                          | 36               | 19         | 53%            | 76.6                           | 119.6         | 56%          |
| 5                          | 36               | 19         | 53%            | 83.9                           | 183.7         | 119%         |
| 6                          | 36               | 10         | 28%            | 34.6                           | 44.2          | 27%          |
| 7                          | 36               | 17         | 47%            | 68.7                           | 124.2         | 81%          |
| 8                          | 36               | 20         | 56%            | 80.0                           | 130.2         | 63%          |
| 9                          | 36               | 20         | 56%            | 89.3                           | 199.0         | 123%         |
| 10                         | 36               | 26         | 72%            | 112.4                          | 255.4         | 127%         |
| <b><i>P. compressa</i></b> | <b>360</b>       | <b>201</b> | <b>56%</b>     | <b>699.4</b>                   | <b>1603.7</b> | <b>129%</b>  |
| 1                          | 36               | 22         | 61%            | 65.1                           | 133.7         | 106%         |
| 2                          | 36               | 19         | 53%            | 74.4                           | 132.4         | 78%          |
| 3                          | 36               | 18         | 50%            | 72.1                           | 147.9         | 105%         |
| 4                          | 36               | 21         | 58%            | 78.7                           | 154.7         | 97%          |
| 5                          | 36               | 15         | 42%            | 52.3                           | 97.2          | 86%          |
| 6                          | 36               | 22         | 61%            | 72.0                           | 147.0         | 104%         |
| 7                          | 36               | 26         | 72%            | 88.8                           | 173.9         | 96%          |
| 8                          | 36               | 15         | 42%            | 47.7                           | 111.3         | 133%         |
| 9                          | 36               | 21         | 58%            | 74.9                           | 232.7         | 211%         |
| 10                         | 36               | 22         | 61%            | 73.4                           | 273.0         | 272%         |
| <b>Grand Total</b>         | <b>720</b>       | <b>398</b> | <b>55%</b>     | <b>1531.9</b>                  | <b>3304.4</b> | <b>116%</b>  |
