# Supplementary material for: Coral micro-fragmentation assays for optimizing active reef restoration efforts
Source: PeerJ journal article supplement (doi:10.7717/peerj.13653), 2022-07-18
Supplement: Appendix_16_Block_assay_model_surv.pdf [file Appendix_16_Block_assay_model_surv.pdf]

| <b>A) Site survivorship</b> |                 | <i>Montipora capitata</i> |                    |                     |
|-----------------------------|-----------------|---------------------------|--------------------|---------------------|
| <b>Fixed effects</b>        | <b>Estimate</b> | <b>SE</b>                 | <b>z value</b>     | <b>Pr (&gt; z )</b> |
| Intercept                   | 2.0906          | 0.6600                    | 3.168              | <b>0.0015</b>       |
| Site 2                      | 1.2089          | 1.1968                    | 1.010              | 0.3125              |
| Site 3                      | -1.8109         | 0.7353                    | -2.463             | <b>0.0138</b>       |
| Site 4                      | -0.4992         | 0.8428                    | -0.592             | 0.5537              |
| Site 5                      | -0.9207         | 0.7905                    | -1.165             | 0.2441              |
| Site 6                      | -2.6284         | 0.7673                    | -3.425             | <b>0.0006</b>       |
| Site 7                      | -1.5006         | 0.7514                    | -1.997             | <b>0.0458</b>       |
| Site 8                      | -1.5865         | 0.7337                    | -2.162             | <b>0.0306</b>       |
| Site 9                      | -0.4129         | 0.8391                    | -0.492             | 0.6227              |
| Site 10                     | 0.5123          | 0.9681                    | 0.529              | 0.5967              |
| <b>Random effects</b>       | <b>Variance</b> |                           | <b>SD</b>          |                     |
| Genotype                    | 0.364           |                           | 0.6033             |                     |
| <b>R- squared</b>           | <b>Marginal</b> |                           | <b>Conditional</b> |                     |
|                             | 0.2520          |                           | 0.3265             |                     |
| <b>AIC</b>                  | 281.6           |                           |                    |                     |
| <b>B)</b>                   |                 | <i>Porites compressa</i>  |                    |                     |
| <b>Fixed effects</b>        | <b>Estimate</b> | <b>SE</b>                 | <b>z value</b>     | <b>Pr (&gt; z )</b> |
| Intercept                   | 1.9688          | 0.6259                    | 3.146              | <b>0.0017</b>       |
| Site 2                      | -0.0459         | 0.8848                    | -0.052             | 0.9586              |
| Site 3                      | -1.0103         | 0.7623                    | -1.325             | 0.1850              |
| Site 4                      | -0.2766         | 0.8267                    | -0.335             | 0.7379              |
| Site 5                      | -1.2160         | 0.7693                    | -1.581             | 0.1140              |
| Site 6                      | 0.3981          | 0.9639                    | 0.413              | 0.6796              |
| Site 7                      | -0.2831         | 0.7893                    | -0.359             | 0.7198              |
| Site 8                      | 0.7282          | 1.2008                    | 0.606              | 0.5443              |
| Site 9                      | 0.0548          | 0.8812                    | 0.062              | 0.9504              |
| Site 10                     | 0.5025          | 0.9704                    | 0.518              | 0.6046              |
| <b>Random effects</b>       | <b>Variance</b> |                           | <b>SD</b>          |                     |
| Genotype                    | 0.1235          |                           | 0.3514             |                     |
| <b>R- squared</b>           | <b>Marginal</b> |                           | <b>Conditional</b> |                     |
|                             | 0.0859          |                           | 0.1189             |                     |
| <b>AIC</b>                  | 216.8           |                           |                    |                     |
