# Supplementary material for: Coral micro-fragmentation assays for optimizing active reef restoration efforts
Source: PeerJ journal article supplement (doi:10.7717/peerj.13653), 2022-07-18
Supplement: Appendix_17_Block_assay_model_growth.pdf [file Appendix_17_Block_assay_model_growth.pdf]

| <b>A) Site net growth</b> |                 |           |                      |
|---------------------------|-----------------|-----------|----------------------|
| <i>Montipora capitata</i> |                 |           |                      |
| <b>Fixed effects</b>      | <b>Estimate</b> | <b>SE</b> | <b>t value</b>       |
| Intercept                 | 140.70          | 22.12     | 6.361                |
| Site 2                    | 29.28           | 27.67     | 1.058                |
| Site 3                    | -70.87          | 30.41     | -2.331               |
| Site 4                    | -79.52          | 29.97     | -2.653               |
| Site 5                    | -25.01          | 29.92     | -0.836               |
| Site 6                    | -108.93         | 36.47     | -2.987               |
| Site 7                    | -60.15          | 30.86     | -1.949               |
| Site 8                    | -71.79          | 29.58     | -2.427               |
| Site 9                    | -11.53          | 29.46     | -0.391               |
| Site 10                   | -16.27          | 27.67     | -0.588               |
| <b>Random effects</b>     | <b>Variance</b> | <b>SD</b> |                      |
| Genotype                  | 640.9           | 25.32     |                      |
| Residual                  | 9071.8          | 95.25     |                      |
| <b>ANOVA</b>              | <b>Chisq</b>    | <b>Df</b> | <b>Pr(&gt;Chisq)</b> |
| Site                      | 33.986          | 9         | <b>8.983e-05</b>     |

| <b>B)</b>                |                 |           |                      |
|--------------------------|-----------------|-----------|----------------------|
| <i>Porites compressa</i> |                 |           |                      |
| <b>Fixed effects</b>     | <b>Estimate</b> | <b>SE</b> | <b>t value</b>       |
| Intercept                | 11.0055         | 1.0411    | 10.571               |
| Site 2                   | -1.2182         | 1.3069    | -0.932               |
| Site 3                   | -0.0462         | 1.2871    | -0.036               |
| Site 4                   | -0.0367         | 1.2645    | -0.029               |
| Site 5                   | -0.5096         | 1.3935    | -0.366               |
| Site 6                   | 0.4623          | 1.2578    | 0.368                |
| Site 7                   | -1.1221         | 1.1479    | -0.978               |
| Site 8                   | 0.3725          | 1.3026    | 0.286                |
| Site 9                   | 3.8157          | 1.2238    | 3.118                |
| Site 10                  | 4.6992          | 1.1940    | 3.936                |
| <b>Random effects</b>    | <b>Variance</b> | <b>SD</b> |                      |
| Genotype                 | 2.896           | 1.702     |                      |
| Residual                 | 14.129          | 3.759     |                      |
| <b>ANOVA</b>             | <b>Chisq</b>    | <b>Df</b> | <b>Pr(&gt;Chisq)</b> |
| Site                     | 49.543          | 9         | <b>1.313e-07</b>     |
